# Supplementary material
Source: bioRxiv or medRxiv preprint supplement (https://www.medrxiv.org/highwire/filestream/81080/field_highwire_adjunct_files/0/2020.05.15.20103549-1.pdf)
Supplement: Supplementary file [file 2020.05.15.20103549-1.pdf]

## **SUPPLEMENTARY ONLINE CONTENT**

### Cytokine profile in plasma of severe COVID-19 does not differ from ARDS and sepsis

Jennifer G. Wilson<sup>1\*</sup>, Laura J. Simpson<sup>2\*</sup>, Anne-Maud Ferreira<sup>3\*</sup>, Arjun Rustagi<sup>2</sup>, Jonasel Roque<sup>2</sup>, Adijat Asuni<sup>2</sup>, Thanmayi Ranganath<sup>2</sup>, Philip M. Grant<sup>2</sup>, Aruna Subramanian<sup>2</sup>, Yael Rosenberg-Hasson<sup>4</sup>, Holden T. Maecker<sup>4</sup>, Susan P. Holmes<sup>3</sup>, Joe E. Levitt<sup>2</sup>, Catherine A. Blish<sup>2,4,5</sup>, Angela J. Rogers<sup>2</sup>

#### Contents

Appendix: Supplementary description of cytokine measurement methods.

Figure s1: Principal component analysis of 70 additional cytokines by patient group.

Figure s2: Differentially expressed cytokines: IL-16, IL-21, IL-28A (IFNL2), and TSLP.

Figure s3: Expression of additional 66 cytokines.

## APPENDIX: Supplementary description of cytokine measurement methods

**Luminex -EMD Millipore H76:** Luminex assays were performed at the Human Immune Monitoring Center at Stanford University. All samples were run in duplicate in a single plate per panel. Kits were purchased from EMD Millipore Corporation, Burlington, MA., and used according to the manufacturer's recommendations with modifications described as follows: H76 kits include 3 panels. Panel 1 is Milliplex HCYTMAG60PMX41BK with IL-18 and IL-22 added to generate a 43-plex assay. Panel 2 is Milliplex HCP2MAG62KPX23BK with MIG/CXCL9 added to generate a 24-plex assay. Panel 3 includes the Milliplex HSP1MAG-63K with Resistin, Leptin and HGF added to generate a 9-plex assay. The setup of the assay was as recommended. Briefly, samples were mixed with antibody-linked magnetic beads in a 96-well plate and incubated overnight at 4°C with shaking. Cold and room temperature incubation steps were performed on an orbital shaker at 500-600 rpm. Plates were washed twice with a wash buffer in a Biotek ELx405 washer. Following a one-hour incubation at room temperature with biotinylated detection antibody, streptavidin-PE was added for 30 minutes with shaking. Plates were washed as above and PBS was added to wells for reading in the Luminex L200 Instrument with a lower bound of 50 beads per sample per cytokine. Each sample was measured in duplicate. Custom Assay Chex control beads were purchased from Radix Biosolutions, Georgetown, Texas, and are added to all wells and their median fluorescence intensity (MFI) was quantified.

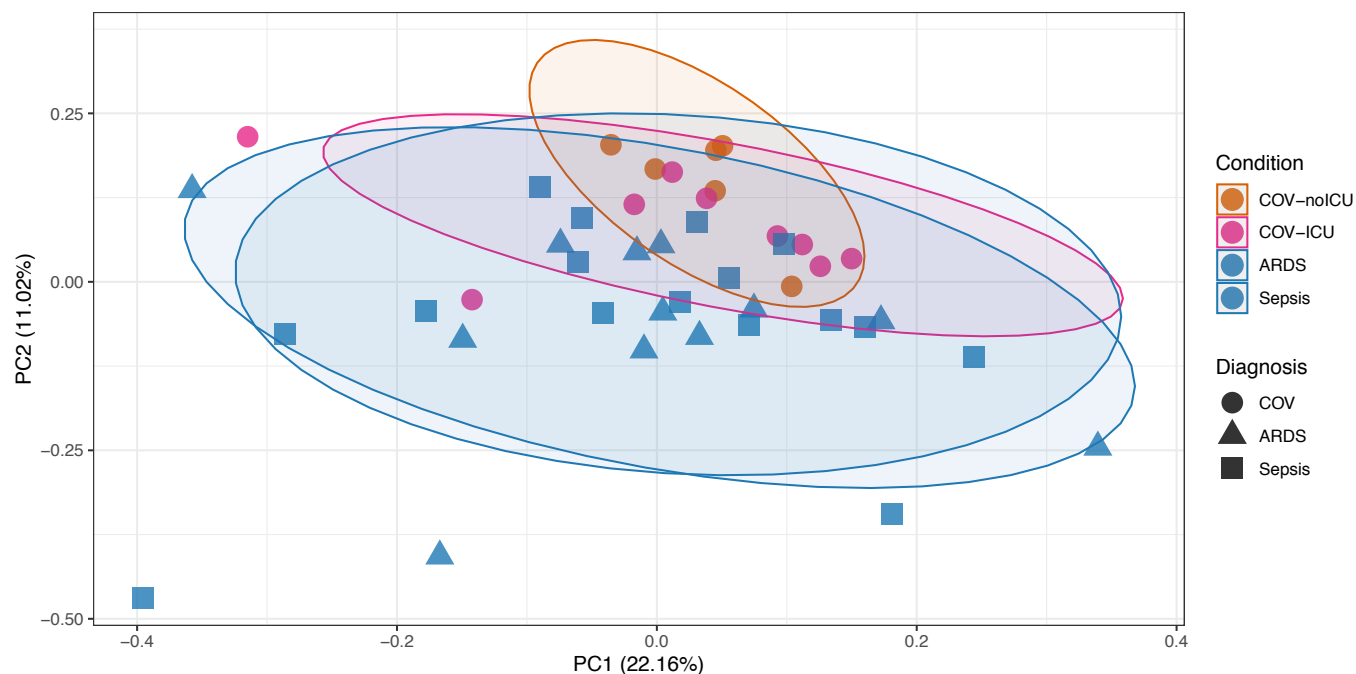

Figure S1. Principal component analysis (PCA) of 70 additional cytokines in moderate COVID-19, severe COVID-19, and ARDS/Sepsis. Cytokine expression levels of two replicates per sample were measured in plasma using Luminex, and normalized for nonspecific binding, resulting in the mean of plate-detrended median fluorescence intensity (dpMFI) values for each cytokine per sample. Moderate COVID-19 (COV-noICU, orange),  $n = 6$ . Severe COVID-19 (COV-ICU, pink),  $n = 9$ . ARDS/Sepsis (blue),  $n = 28$ . PCA computed by singular value decomposition of the dpMFI values of the 70 cytokines, colored by condition. The first principal component (PC) explains 22.16% of the variability; the second PC explains 11.02% of the variability. The data ellipses were computed assuming a multivariate t-distribution with the ggfortify R package.

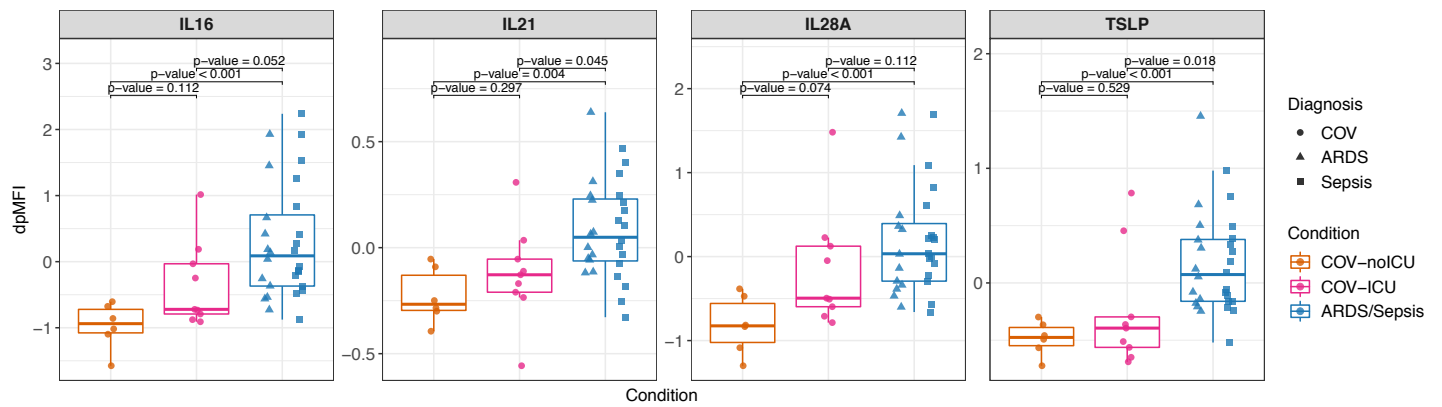

Figure S2. Differentially expressed cytokines: box plots are shown for IL-16, IL-21, IL-28A (IFNL2), and TSLP, which were the only 4 cytokines that had adjusted p-values < 0.05 by Kruskal-Wallis test with correction for multiple testing with the Benjamini-Hochberg method. Moderate COVID-19 (COV-noICU, orange), n = 6. Severe COVID-19 (COV-ICU, pink), n = 9. ARDS/Sepsis (blue), n = 28. Adjusted p-values for specific comparisons shown in the plots were calculated by Wilcoxon rank sum tests with correction by the Benjamini-Hochberg correction method. The box plot visualizes the following summary statistics: the middle line represents the median; the lower hinge corresponds to the first quartile (25th); the upper hinge corresponds to the third quartile (75th); upper and lower whiskers extend from the hinge respectively to the largest value and smallest value or no further than 1.5 \* interquartile range; data points beyond the whiskers are outliers.

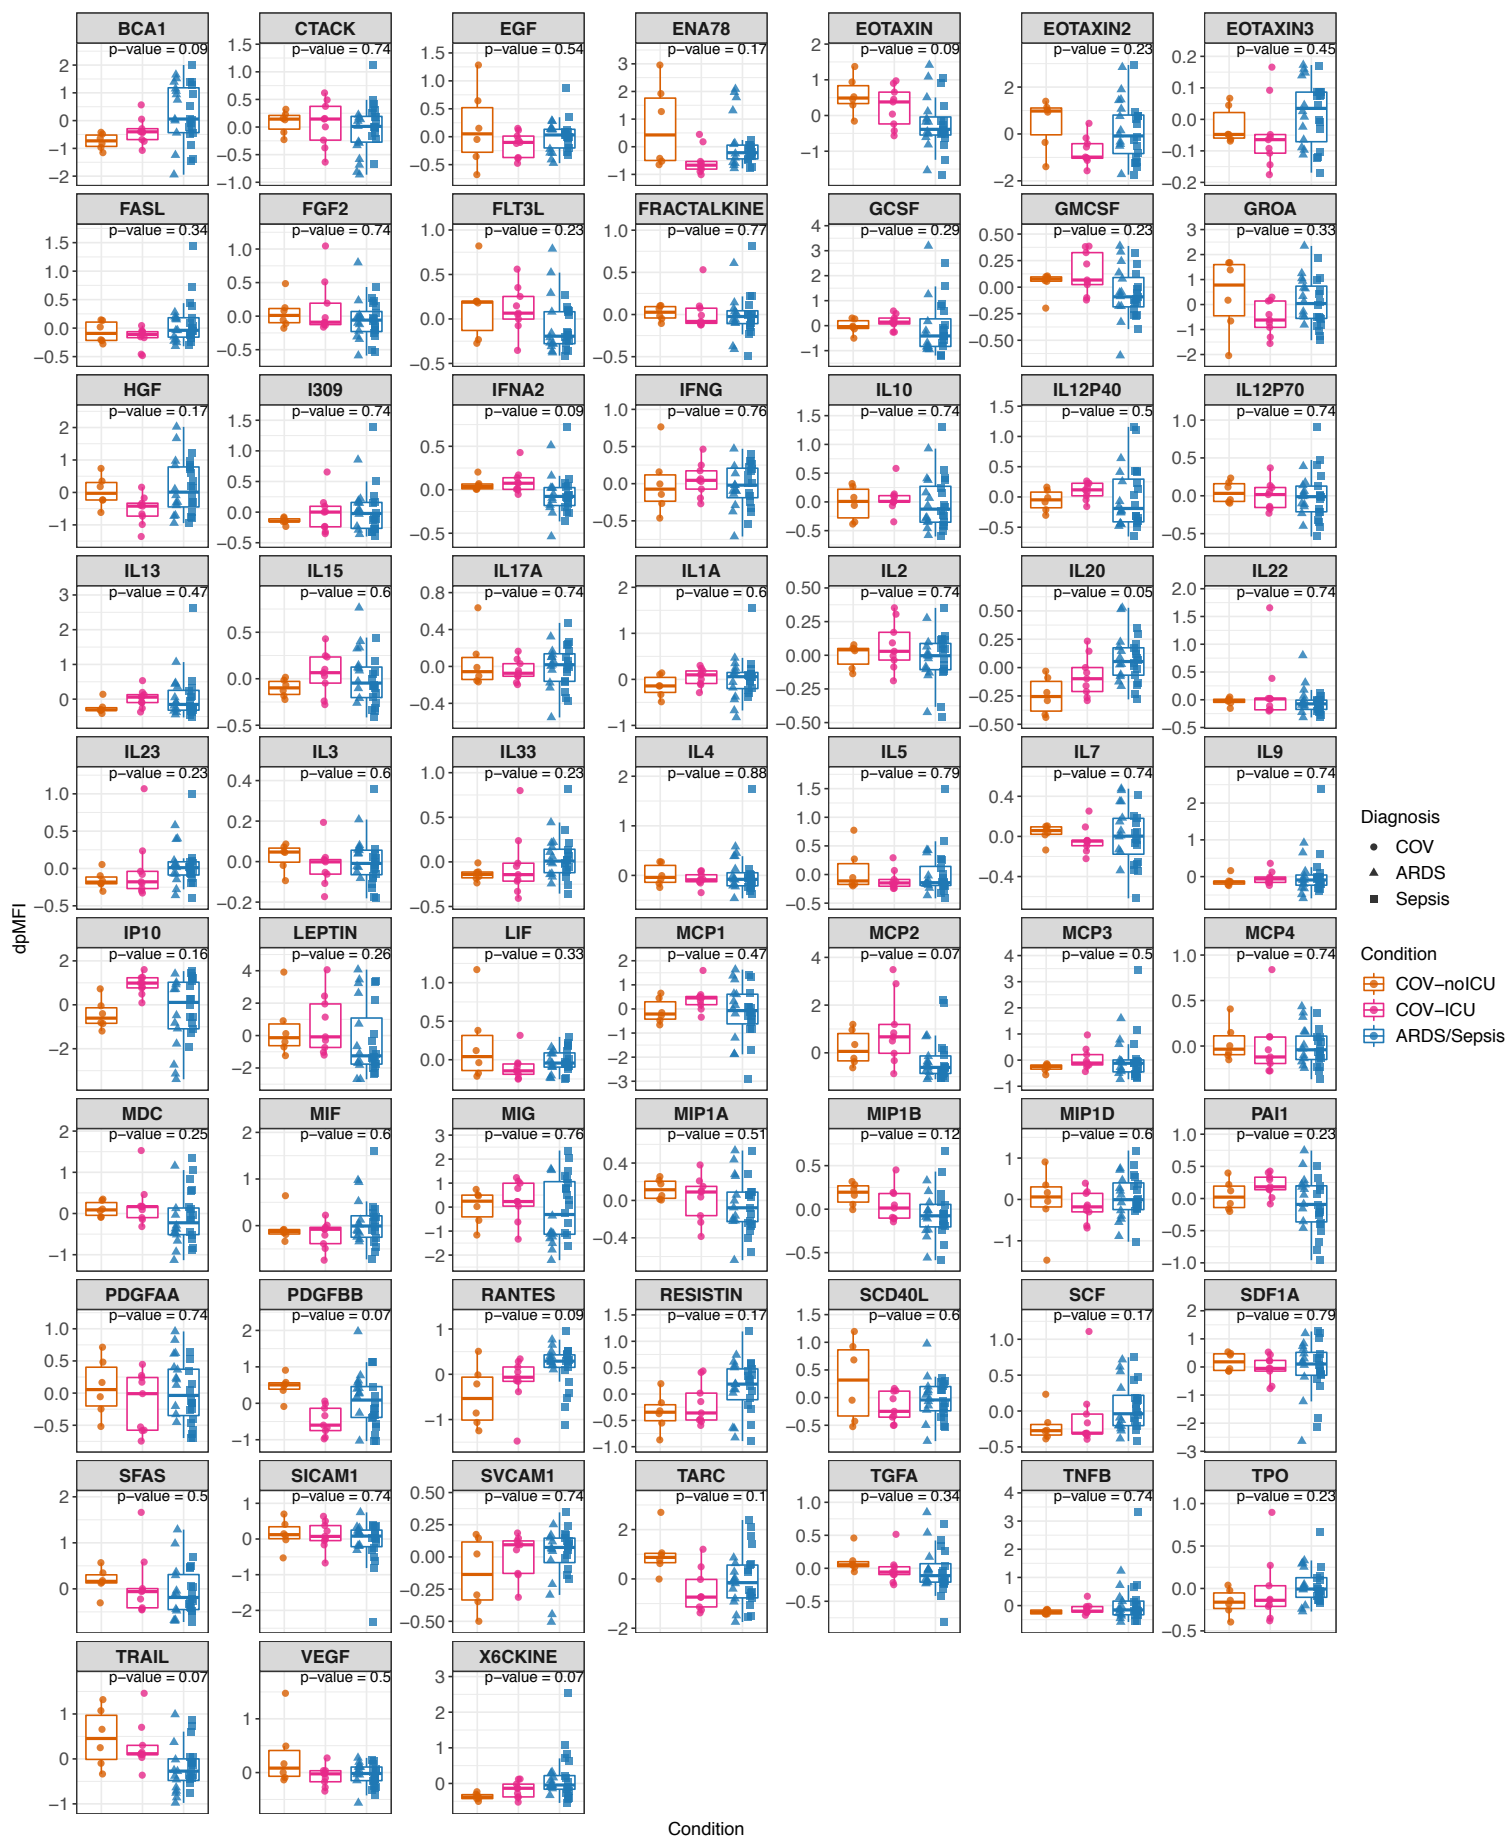

Figure S3. Boxplots for the remaining 66 cytokines measured. Moderate COVID-19 (COV-noICU, orange), n = 6. Severe COVID-19 (COV-ICU, pink), n = 9. ARDS/Sepsis (blue), n = 28. Adjusted p-values (shown in the top right of the plot for each cytokine) were all  $>0.05$  by Kruskal-Wallis test with correction for multiple testing with the Benjamini-Hochberg method.
